# Supplementary material for: COQ4 Mutations Cause a Broad Spectrum of Mitochondrial Disorders Associated with CoQ10 Deficiency
Source: PubMed Central journal article supplement — Am J Hum Genet. 2015 Feb 5;96(2):309–17. doi: 10.1016/j.ajhg.2014.12.023 (PMC4320255; doi:10.1016/j.ajhg.2014.12.023), 2015-02-05
Supplement: mmc1.pdf [file mmc1.pdf]

The American Journal of Human Genetics

Supplemental Data

**COQ4 Mutations Cause a Broad Spectrum  
of Mitochondrial Disorders Associated  
with CoQ<sub>10</sub> Deficiency**

Gloria Brea-Calvo, Tobias B. Haack, Daniela Karall, Akira Ohtake, Federica Invernizzi, Rosalba Carrozzo, Laura Kremer, Sabrina Dusi, Christine Fauth, Sabine Scholl-Bürgi, Elisabeth Graf, Uwe Ahting, Nicoletta Resta, Nicola Laforgia, Daniela Verrigni, Yasushi Okazaki, Masakazu Kohda, Diego Martinelli, Peter Freisinger, Tim M. Strom, Thomas Meitinger, Costanza Lamperti, Atilano Lacson, Placido Navas, Johannes A. Mayr, Enrico Bertini Kei Murayama, Massimo Zeviani, Holger Prokisch, and Daniele Ghezzi

## SUPPLEMENTAL DATA

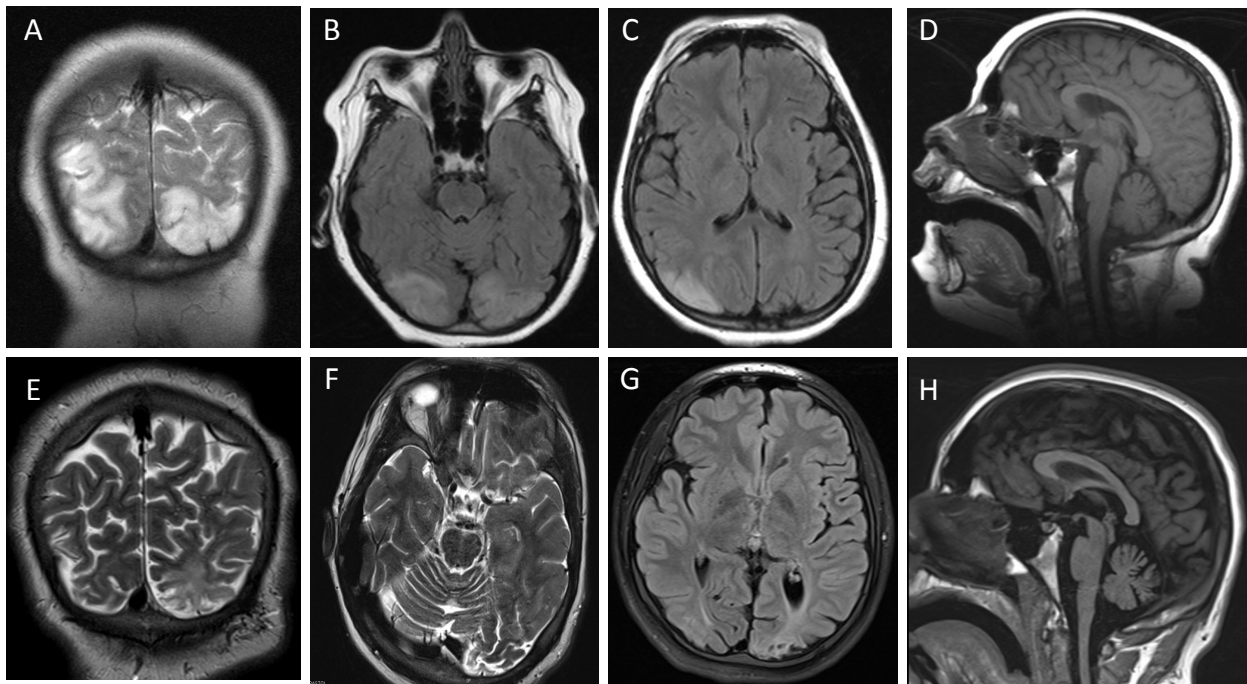

**Figure S1. Brain MRI of subject 5.**

Two serial brain MRI images of subject S5 obtained at age 12 years (A-D) and at age 17 years (E-H). A and E are coronal T2 weighted sections to show abnormal hyperintense cortical areas corresponding to infarct-like lesions of the occipital lobes at two different stages of progression to cortical atrophy with scars (E-G); The same occipital abnormal hyperintense cortical areas are shown in axial sections B and C (FLAIR weighted), F (T2 weighted) and G (FLAIR weighted). Notice that no abnormality is present in basal ganglia and brainstem. Finally, figures D and H are sagittal T1 sections showing progressive cerebellar atrophy of the vermis.

| <b>Id</b> | <b>Type</b>      | <b>Reads</b> | <b>Mapped</b> | <b>Percent</b> | <b>Seq (Gb)</b> | <b>on bait</b> | <b>Avg cov</b> | <b>Cov 1x</b> | <b>Cov 4x</b> | <b>Cov 8x</b> | <b>Cov 20x</b> |
|-----------|------------------|--------------|---------------|----------------|-----------------|----------------|----------------|---------------|---------------|---------------|----------------|
| S1        | SureSelect50Mbv5 | 106627996    | 105933934     | 99.35          | 10.77           | 78.48          | 132.44         | 99.92         | 99.72         | 99.35         | 97.38          |
| S2        | SeqCapEZ V1      | 130889538    | 125611825     | 95.97          | 13.81           | 62.71          | 155.83         | 98.36         | 97.32         | 96.41         | 93.80          |
| S4        | SureSelect50Mbv5 | 90821087     | 90214603      | 99.33          | 9.17            | 78.99          | 113.62         | 99.80         | 99.52         | 99.05         | 96.55          |
| S5        | SureSelect50Mbv4 | 125822167    | 124979728     | 99.33          | 12.71           | 73.98          | 146.50         | 99.95         | 99.80         | 99.55         | 98.22          |

**Table S1: Exome Sequencing Statistics**

Avg: average; Cov: coverage

| <b>Nucleotide Change</b> | <b>Amino acid Change</b> | <b>Subject</b> | <b>Status</b>                           | <b>Polyphen2</b>  | <b>SIFT</b> | <b>PMUT</b>  | <b>Mutation taster</b> |
|--------------------------|--------------------------|----------------|-----------------------------------------|-------------------|-------------|--------------|------------------------|
| c.[433C>G]               | p.[Arg145Gly]            | S1             | Homozygous                              | Probably damaging | Deleterious | Pathological | Disease causing        |
| c.[718C>T]               | p.[Arg240Cys]            | S2             | CE with a nonsense mutation p.[Arg141*] | Probably damaging | Deleterious | Pathological | Disease causing        |
| c.[155T>C]               | p.[Leu52Ser]             | S3, S4         | CE with a deletion p.[Thr174del]        | Probably damaging | Deleterious | Neutral      | Disease causing        |
| c.[190C>T]               | p.[Pro64Ser]             | S5             | Homozygous                              | Probably damaging | Deleterious | Neutral      | Disease causing        |

**Table S2: In silico prediction of pathogenicity for *COQ4* mutations**

CE: compound heterozygous.
